# Supplementary material
Source: Elsevier journal article supplement (https://www.sciencedirect.com/science/article/pii/S0213485313002958)
Supplement: mmc1 [file S0213485313002958:mmc1.pdf]

**APÉNDICE**

**PRUEBE SU MEMORIA** (El test TYM) / 50

ESCRIBA SU NOMBRE Y APELLIDOS:

.....

¿QUÉ DÍA DE LA SEMANA ES HOY? .....

¿EN QUÉ FECHA ESTAMOS?: AÑO..... MES..... DÍA.....

¿CUÁNTOS AÑOS TIENE?: .....

¿SU FECHA DE NACIMIENTO?: DÍA.....MES.....AÑO.....

1

*Por favor, copie la siguiente frase:*

**LOS BUENOS CIUDADANOS SIEMPRE LLEVAN ZAPATOS RESISTENTES**

.....

.....

*Lea de nuevo la frase e intente aprenderla de memoria*

2

¿QUIÉN ES EL PRESIDENTE DEL GOBIERNO?

.....

¿EN QUÉ AÑO COMENZÓ LA GUERRA CIVIL ESPAÑOLA? .....

3

**CÁLCULO**

20 - 4 = .....

16 + 17 = .....

8 x 6 = .....

4 + 15 - 17 = .....

**NOMBRE CUATRO ANIMALES  
QUE COMIENCEN POR LA LETRA  
"P"**

1 P .....

2 P .....

3 P .....

4 P .....

4

4

¿EN QUÉ SE PARECEN UNA ZANAHORIA Y UNA PATATA?

.....

¿EN QUÉ SE PARECEN UN LEÓN Y UN LOBO?

.....

4

**RECUERDE: LOS BUENOS CIUDADANOS SIEMPRE LLEVAN ZAPATOS RESISTENTES**

*Por favor, dé la vuelta a esta hoja*

**PONGA NOMBRE A LO QUE ESTÁ SEÑALADO ABAJO**

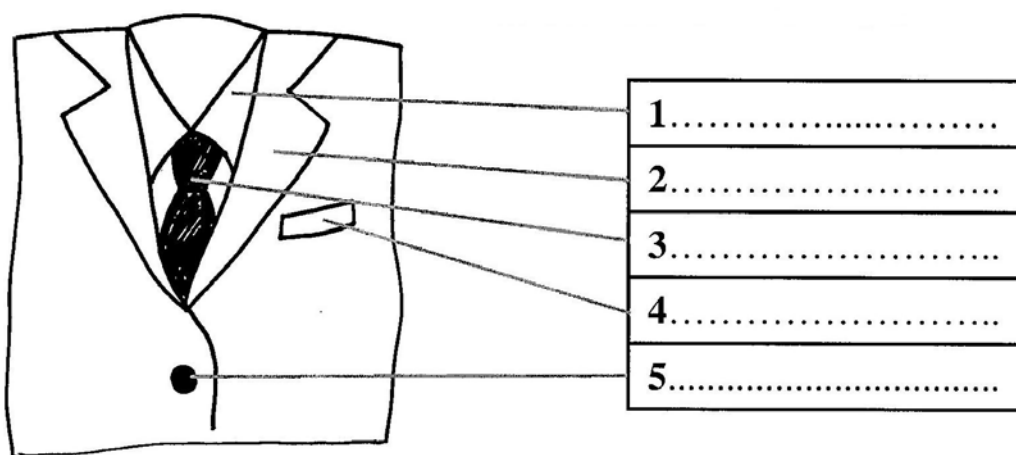

5

**POR FAVOR, UNA LOS CÍRCULOS PARA FORMAR UNA LETRA (NO HAGA CASO DE LOS CUADRADOS)**

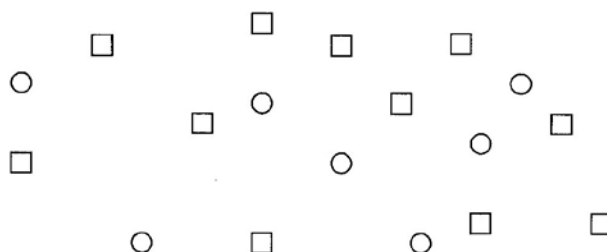

3

**IMAGINE QUE EL CÍRCULO DE ABAJO ES UN RELOJ DE PULSERA Y PONGA LOS NÚMEROS DEL RELOJ BIEN COLOCADOS Y LUEGO LAS MANECILLAS DEL RELOJ SEÑALANDO LAS 9 Y 20**

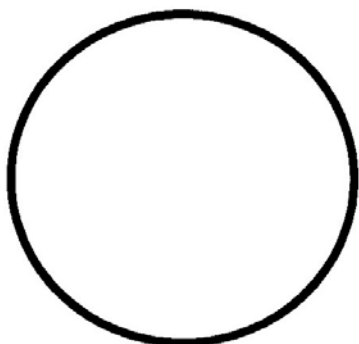

4

**SIN DAR LA VUELTA A LA HOJA, ESCRIBA ABAJO LA FRASE QUE COPIÓ ANTES**

.....

6

Ayuda dada: ninguna / trivial / escasa / moderada / importante  
 Respuestas escritas por el paciente ☐

5

## SISTEMA DE PUNTUACIÓN DEL TYM

Los errores de puntuación, deletreo o puntuación no tiene importancia, si las palabras tienen sentido (a excepción del recuadro 2). La puntuación mínima en una cuestión es 0.

### **Recuadro 1 (Orientación)**

2 puntos por nombre completo, uno por iniciales o errores menores.

1 punto para espacio correctamente relleno en el resto del recuadro. En la fecha actual se acepta un error de un día.

### **Recuadro 2 (Copia de una frase)**

2 puntos todo correcto

1 punto falta una palabra

0 puntos falta más de una palabra

### **Recuadro 3 (Información semántica: presidente del gobierno, año de la guerra civil)**

1 punto por el apellido y un punto más por el nombre de pila. "1936" o "año 36" es un punto. Total 3 puntos posibles

### **Recuadro 4 (Cálculo)**

1 punto por cada suma correcta

### **Recuadro 5 (Fluidez verbal)**

Se cuenta como correcto cualquier animal real que comience por "p" (pez, ave o animal terrestre), también razas de perros u otros animales. No se aceptan criaturas míticas

### **Recuadro 6 (Similaridades)**

2 puntos para una semejanza abstracta correcta (vegetales, tubérculos; animales, mamíferos, carnívoros...)

1 punto para respuestas menos precisas (comida, cuatro patas...) Dos puntos si se dan dos semejanzas de tipo concreto (p.e. fiera y cuatro patas)

**Nombrar partes de la vestimenta** (Denominación por confrontación): un punto por respuesta correcta: cuello (o camisa), solapa (o chaqueta), corbata (o nudo de corbata), bolsillo (o pañuelo), botón.

**Letra W** (Percepción): sin errores 3 puntos, forma otra letra, 2 puntos, une todos los círculos y no incluye cuadrados 1 punto-

**Reloj:** todos los números 1 punto, números correctamente distribuidos 1 punto, ambas agujas bien situadas 1 punto cada una.

**Frase:** 1 punto por palabra correcta hasta un máximo de 6.

### **Añadir la puntuación por la ayuda requerida:**

|          |     |
|----------|-----|
| Ninguna  | + 5 |
| Trivial  | + 4 |
| Ligera   | + 3 |
| Moderada | + 2 |
| Mucha    | + 1 |
